# Supplementary material for: Synergistic Use of Multispectral Data and Crop Growth Modelling for Spatial and Temporal Evapotranspiration Estimations
Source: MDPI journal article supplement (doi:10.3390/rs13112138), 2021-05-29
Supplement: s1 [file s1]

Archive with 1 entries (1 files):
- remotesensing-1211573-SI.pdf
